# Supplementary material for: Allopurinol for Secondary Prevention in Patients with Cardiovascular Disease: A Systematic Review and Meta-Analysis of Randomized Controlled Trials
Source: MDPI journal article supplement (doi:10.3390/jcdd10090379), 2023-09-04
Supplement: s1 [file s1]

# Supplemental appendix

## Supplement to:

### Allopurinol for Secondary Prevention in Patients with Cardiovascular Disease: A Systematic Review and Meta-analysis of Randomized Controlled Trials

## 1. Search strategy

|        | strategy                                                                                                                                                                                                                                                                                                                                                                                                                                                                                                                                                                                                                                                                                                                                                                                                                                                                                                                                                                                                                                                                                                                                                                                                                                                                                                                                                                                                                                  | hits      |
|--------|-------------------------------------------------------------------------------------------------------------------------------------------------------------------------------------------------------------------------------------------------------------------------------------------------------------------------------------------------------------------------------------------------------------------------------------------------------------------------------------------------------------------------------------------------------------------------------------------------------------------------------------------------------------------------------------------------------------------------------------------------------------------------------------------------------------------------------------------------------------------------------------------------------------------------------------------------------------------------------------------------------------------------------------------------------------------------------------------------------------------------------------------------------------------------------------------------------------------------------------------------------------------------------------------------------------------------------------------------------------------------------------------------------------------------------------------|-----------|
| PubMed |                                                                                                                                                                                                                                                                                                                                                                                                                                                                                                                                                                                                                                                                                                                                                                                                                                                                                                                                                                                                                                                                                                                                                                                                                                                                                                                                                                                                                                           |           |
| #1     | Allopurinol[Mesh] OR allopurinol[tiab] OR Uribenz[tiab] OR Allopurin[tiab] OR Allorin[tiab] OR Allpargin[tiab] OR Allural[tiab] OR Pan Quimica[tiab] OR Apulonga[tiab] OR Apurin[tiab] OR Atisuril[tiab] OR Bleminol[tiab] OR Caplenal[tiab] OR Capurate[tiab] OR Cellidrin[tiab] OR Embarin[tiab] OR Suspendol[tiab] OR Foligan[tiab] OR Hamarin[tiab] OR Lopurin[tiab] OR Lysuron[tiab] OR Jenapurinol[tiab] OR Milurit[tiab] OR Milurite[tiab] OR Novopurol[tiab] OR Uripurinol[tiab] OR Urosin[tiab] OR Urtias[tiab] OR Xanthomax[tiab] OR Uridocid[tiab] OR Xanturic[tiab] OR Zygout[tiab] OR Zyloprim[tiab] OR Zyloric[tiab] OR Pureduct[tiab] OR Purinol[tiab] OR Progout[tiab] OR Remid[tiab] OR Rimapurinol[tiab] OR Roucol[tiab] OR Tipuric[tiab] OR Allohexal[tiab] OR Allohexan[tiab] OR Alloprin[tiab]                                                                                                                                                                                                                                                                                                                                                                                                                                                                                                                                                                                                                       | 11,226    |
| #2     | "Cardiovascular Diseases"[Mesh] OR "cardiovascular disease*" [tiab] OR CVD[tiab] OR "Heart Diseases"[Mesh] OR "heart disease*" [tiab] OR "heart disorder*" [tiab] OR "cardiac disease*" [tiab] OR "cardiac disorder*" [tiab] OR "heart attack" [tiab] OR "heart*" [tiab] OR "cardiac" [tiab] OR "Hypertension"[Mesh] OR "Blood Pressure*" [tiab] OR "Hypertension" [tiab] OR "Hypersensitive" [tiab] OR "Pulmonary Heart Disease"[Mesh] OR "Pulmonary Heart Disease*" [tiab] OR "Cor Pulmonale" [tiab] OR "Myocardial Ischemia"[Mesh] OR "myocardial ischemia" [tiab] OR "ischemic heart disease" [tiab] OR "Coronary Artery Disease"[Mesh] OR "coronary artery disease" [tiab] OR "coronary heart disease" [tiab] OR CAD[tiab] OR "coronary disease" [tiab] OR "myocardial infarction" [tiab] OR "angina" [tiab] OR "acute coronary syndrome" [tiab] OR "coronary" [tiab] OR "Heart Failure"[Mesh] OR "Heart Failure" [tiab] OR "Cardiac Failure" [tiab] OR "Heart Decompensation" [tiab] OR "Myocardial Failure" [tiab] OR "Congestive Heart Failure" [tiab] OR "Cerebrovascular Disorders"[Mesh] OR "Cerebrovascular Disorder*" [tiab] OR "Intracranial Vascular Disease*" [tiab] OR "Intracranial Vascular Disorder*" [tiab] OR "Cerebrovascular Disease*" [tiab] OR "Brain Vascular Disorder*" [tiab] OR "Brain Vascular Disease*" [tiab] OR "Cerebrovascular Occlusion*" [tiab] OR "Cerebrovascular Insufficiency" [tiab] OR "Brain | 3,863,631 |

|        |                                                                                                                                                                                                                                                                                                                                                                                                                                                                                                                                                                                                                                                                                                                                                                                                                                                                                                                                                                                                                                            |           |
|--------|--------------------------------------------------------------------------------------------------------------------------------------------------------------------------------------------------------------------------------------------------------------------------------------------------------------------------------------------------------------------------------------------------------------------------------------------------------------------------------------------------------------------------------------------------------------------------------------------------------------------------------------------------------------------------------------------------------------------------------------------------------------------------------------------------------------------------------------------------------------------------------------------------------------------------------------------------------------------------------------------------------------------------------------------|-----------|
|        | Ischemia"[Mesh] OR "Brain Ischemia"[tiab] OR "Ischemic Encephalopath"[tiab] OR "Cerebral Ischemia"[tiab] OR "Brain infarction"[tiab] OR "Cerebral infarction"[tiab] OR "Brain Stem infarction"[tiab] OR "Transient ischemic attack"[tiab] OR TIA[tiab] OR "Stroke"[Mesh] OR "Stroke"[tiab] OR "Cerebrovascular accident"[tiab] OR CVA[tiab] OR "Arteriosclerosis"[Mesh] OR "Arteriosclerosis"[tiab] OR "Atherosclerosis"[tiab] OR "Arterioscleroses"[tiab] OR ASCVD[tiab] OR "Peripheral Arterial Disease"[Mesh] OR "Peripheral Arterial Disease"[tiab] OR PAD[tiab] OR "Intermittent Claudication"[tiab] OR "Fontaine"[tiab] OR MACE[tiab] OR "major adverse cardiovascular events"[tiab] OR "cardiovascular events"[tiab] OR "cardiac events"[tiab] OR "cardiac death"[tiab] OR "cardiac mortality"[tiab] OR "cardiovascular death"[tiab] OR "cardiovascular mortality"[tiab]                                                                                                                                                            |           |
| #3     | ("randomized controlled trial"[pt] OR "controlled clinical trial"[pt] OR randomized[tiab] OR placebo[tiab] OR "drug therapy"[sh] OR randomly[tiab] OR trial[tiab] OR groups[tiab]) NOT (animals [mh] NOT humans [mh])                                                                                                                                                                                                                                                                                                                                                                                                                                                                                                                                                                                                                                                                                                                                                                                                                      | 4,935,960 |
| #4     | #1 AND #2 AND #3                                                                                                                                                                                                                                                                                                                                                                                                                                                                                                                                                                                                                                                                                                                                                                                                                                                                                                                                                                                                                           | 872       |
| <hr/>  |                                                                                                                                                                                                                                                                                                                                                                                                                                                                                                                                                                                                                                                                                                                                                                                                                                                                                                                                                                                                                                            |           |
| Embase |                                                                                                                                                                                                                                                                                                                                                                                                                                                                                                                                                                                                                                                                                                                                                                                                                                                                                                                                                                                                                                            |           |
| #1     | 'allopurinol'/exp OR 'allopurinol':ab,ti,kw OR 'uribenz':ab,ti,kw OR 'allopurin':ab,ti,kw OR 'allorin':ab,ti,kw OR 'allpargin':ab,ti,kw OR 'allural':ab,ti,kw OR 'pan quimica':ab,ti,kw OR 'apulonga':ab,ti,kw OR 'apurin':ab,ti,kw OR 'atisuril':ab,ti,kw OR 'bleminol':ab,ti,kw OR 'caplenal':ab,ti,kw OR 'capurate':ab,ti,kw OR 'cellidrin':ab,ti,kw OR 'embarin':ab,ti,kw OR 'suspendol':ab,ti,kw OR 'foligan':ab,ti,kw OR 'hamarin':ab,ti,kw OR 'lopurin':ab,ti,kw OR 'lysuron':ab,ti,kw OR 'jenapurinol':ab,ti,kw OR 'milurit':ab,ti,kw OR 'milurite':ab,ti,kw OR 'novopurol':ab,ti,kw OR 'uripurinol':ab,ti,kw OR 'urosin':ab,ti,kw OR 'urtias':ab,ti,kw OR 'xanthomax':ab,ti,kw OR 'uridocid':ab,ti,kw OR 'xanturic':ab,ti,kw OR 'zygout':ab,ti,kw OR 'zyloprim':ab,ti,kw OR 'zyloric':ab,ti,kw OR 'pureduct':ab,ti,kw OR 'purinol':ab,ti,kw OR 'progout':ab,ti,kw OR 'remid':ab,ti,kw OR 'rimapurinol':ab,ti,kw OR 'roucol':ab,ti,kw OR 'tipuric':ab,ti,kw OR 'allohexal':ab,ti,kw OR 'allohexan':ab,ti,kw OR 'alloprin':ab,ti,kw | 27,457    |
| #2     | 'cardiovascular disease'/exp OR 'cardiovascular disease*':ab,ti,kw OR 'cvd':ab,ti,kw OR 'heart disease'/exp OR 'heart disease*':ab,ti,kw OR 'heart disorder*':ab,ti,kw OR 'cardiac disease*':ab,ti,kw OR 'cardiac disorder*':ab,ti,kw OR 'heart attack':ab,ti,kw OR 'heart*':ab,ti,kw OR 'cardiac':ab,ti,kw OR 'hypertension'/exp OR 'Blood Pressure*':ab,ti,kw OR 'Hypertension':ab,ti,kw OR 'Hypersensitive':ab,ti,kw OR 'cor pulmonale'/exp OR 'Pulmonary Heart Disease*':ab,ti,kw OR 'Cor Pulmonale':ab,ti,kw OR 'ischemic heart disease'/exp OR 'ischemic heart disease':ab,ti,kw OR 'Myocardial Ischemia':ab,ti,kw OR 'coronary artery disease'/exp OR 'coronary artery disease':ab,ti,kw OR CAD:ab,ti,kw OR 'coronary heart disease':ab,ti,kw OR 'coronary disease':ab,ti,kw OR 'myocardial infarction':ab,ti,kw OR 'angina':ab,ti,kw OR 'acute coronary                                                                                                                                                                            | 6,238,338 |

syndrome':ab,ti,kw OR 'coronary':ab,ti,kw OR 'heart failure'/exp OR 'Heart Failure':ab,ti,kw OR 'Cardiac Failure':ab,ti,kw OR 'Heart Decompensation':ab,ti,kw OR 'Myocardial Failure':ab,ti,kw OR 'Congestive Heart Failure':ab,ti,kw OR 'cerebrovascular disease'/exp OR 'Cerebrovascular Disorder\*':ab,ti,kw OR 'Intracranial Vascular Disease\*':ab,ti,kw OR 'Cerebrovascular Disease\*':ab,ti,kw OR 'Brain Vascular Disorder\*':ab,ti,kw OR 'Brain Vascular Disease\*':ab,ti,kw OR 'Cerebrovascular Occlusion\*':ab,ti,kw OR 'Cerebrovascular Insufficiency':ab,ti,kw OR 'brain ischemia'/exp OR 'Brain Ischemia':ab,ti,kw OR 'Ischemic Encephalopath\*':ab,ti,kw OR 'Cerebral Ischemia\*':ab,ti,kw OR 'Brain infarction':ab,ti,kw OR 'Cerebral infarction':ab,ti,kw OR 'Brain Stem infarction':ab,ti,kw OR 'Transient ischemic attack':ab,ti,kw OR TIA:ab,ti,kw OR 'cerebrovascular accident'/exp OR 'Stroke':ab,ti,kw OR 'Cerebrovascular accident':ab,ti,kw OR CVA:ab,ti,kw OR 'Atherosclerosis'/exp OR 'Arteriosclerosis':ab,ti,kw OR 'Atherosclerosis':ab,ti,kw OR 'Arterioscleroses':ab,ti,kw OR ASCVD:ab,ti,kw OR 'peripheral arterial disease'/exp OR 'Peripheral Arterial Disease\*':ab,ti,kw OR PAD:ab,ti,kw OR 'Intermittent Claudication':ab,ti,kw OR 'Fontaine':ab,ti,kw OR 'major adverse cardiovascular events':ab,ti,kw OR MACE:ab,ti,kw OR 'cardiovascular events':ab,ti,kw OR 'cardiac events':ab,ti,kw OR 'cardiovascular death':ab,ti,kw OR 'cardiovascular mortality':ab,ti,kw OR 'cardiac death':ab,ti,kw OR 'cardiac mortality':ab,ti,kw

#3

((('randomized controlled trial'/de OR 'controlled clinical trial'/de OR random\*:ti,ab,tt OR 'randomization'/de OR 'intermethod comparison'/de OR placebo:ti,ab,tt OR (compare:ti,tt OR compared:ti,tt OR comparison:ti,tt) OR ((evaluated:ab OR evaluate:ab OR evaluating:ab OR assessed:ab OR assess:ab) AND (compare:ab OR compared:ab OR comparing:ab OR comparison:ab)) OR (open NEXT/1 label):ti,ab,tt OR ((double OR single OR doubly OR singly) NEXT/1 (blind OR blinded OR blindly)):ti,ab,tt OR 'double blind procedure'/de OR (parallel NEXT/1 group\*):ti,ab,tt OR (crossover:ti,ab,tt OR 'cross over':ti,ab,tt) OR ((assign\* OR match OR matched OR allocation) NEAR/6 (alternate OR group OR groups OR intervention OR interventions OR patient OR patients OR subject OR subjects OR participant OR participants)):ti,ab,tt OR (assigned:ti,ab,tt OR allocated:ti,ab,tt) OR (controlled NEAR/8 (study OR design OR trial)):ti,ab,tt OR (volunteer:ti,ab,tt OR volunteers:ti,ab,tt) OR 'human experiment'/de OR Trial:ti,tt) NOT (((random\* NEXT/1 sampl\* NEAR/8 ('cross section\*' OR questionnaire\* OR survey OR surveys OR database OR databases)):ti,ab,tt) NOT ('comparative study'/de OR 'controlled study'/de OR 'randomised controlled':ti,ab,tt OR 'randomized controlled':ti,ab,tt OR 'randomly assigned':ti,ab,tt)) OR ('cross-sectional study'/de NOT ('randomized controlled trial'/de OR 'controlled clinical study'/de OR 'controlled study'/de OR 'randomised controlled':ti,ab,tt OR 'randomized controlled':ti,ab,tt OR 'control group':ti,ab,tt OR 'control groups':ti,ab,tt)) OR ('case control\*':ti,ab,tt AND random\*:ti,ab,tt NOT

2,071,062

(‘randomised controlled’:ti,ab,tt OR ‘randomized controlled’:ti,ab,tt)) OR  
 (‘systematic review’:ti,tt NOT (trial:ti,tt OR study:ti,tt)) OR  
 (nonrandom\*:ti,ab,tt NOT random\*:ti,ab,tt) OR ‘random field’:ti,ab,tt OR  
 (‘random cluster’ NEAR/4 sampl\*):ti,ab,tt OR (review:ab AND review:it  
 NOT trial:ti,tt) OR (‘we searched’:ab AND (review:ti,tt OR review:it)) OR  
 ‘update review’:ab OR (databases NEAR/5 searched):ab OR ((rat:ti,tt OR  
 rats:ti,tt OR mouse:ti,tt OR mice:ti,tt OR swine:ti,tt OR porcine:ti,tt OR  
 murine:ti,tt OR sheep:ti,tt OR lambs:ti,tt OR pigs:ti,tt OR piglets:ti,tt OR  
 rabbit:ti,tt OR rabbits:ti,tt OR cat:ti,tt OR cats:ti,tt OR dog:ti,tt OR dogs:ti,tt  
 OR cattle:ti,tt OR bovine:ti,tt OR monkey:ti,tt OR monkeys:ti,tt OR  
 trout:ti,tt OR marmoset\*:ti,tt) AND ‘animal experiment’/de OR (‘animal  
 experiment’/de NOT (‘human experiment’/de OR ‘human’/de)))) NOT  
 [medline]/lim

|          |                                                                                                                                                                                                                                                                                                                                                                                                                                                                                                                                                                 |         |
|----------|-----------------------------------------------------------------------------------------------------------------------------------------------------------------------------------------------------------------------------------------------------------------------------------------------------------------------------------------------------------------------------------------------------------------------------------------------------------------------------------------------------------------------------------------------------------------|---------|
| #4       | #1 AND #2 AND #3                                                                                                                                                                                                                                                                                                                                                                                                                                                                                                                                                | 475     |
| <hr/>    |                                                                                                                                                                                                                                                                                                                                                                                                                                                                                                                                                                 |         |
| Cochrane |                                                                                                                                                                                                                                                                                                                                                                                                                                                                                                                                                                 |         |
| #1       | MeSH descriptor: [Allopurinol] explode all trees                                                                                                                                                                                                                                                                                                                                                                                                                                                                                                                | 664     |
| #2       | (allopurinol OR Uribenz OR Allopurin OR Allorin OR Allpargin OR<br>Allural OR Pan Quimica OR Apulonga OR Apurin OR Atisuril OR<br>Bleminol OR Caplenal OR Capurate OR Cellidrin OR Embarin OR<br>Suspendol OR Foligan OR Hamarin OR Lopurin OR Lysuron OR<br>Jenapurinol OR Milurit OR Milurite OR Novopurol OR Uripurinol OR<br>Urosin OR Urtias OR Xanthomax OR Uridocid OR Xanturic OR Zygout<br>OR Zyloprim OR Zyloric OR Pureduct OR Purinol OR Progout OR Remid<br>OR Rimapurinol OR Roucol OR Tipuric OR Allohexal OR Allohexan OR<br>Alloprin):ti,ab,kw | 1,441   |
| #3       | #1 OR #2                                                                                                                                                                                                                                                                                                                                                                                                                                                                                                                                                        | 1,441   |
| #4       | MeSH descriptor: [Cardiovascular Diseases] explode all trees                                                                                                                                                                                                                                                                                                                                                                                                                                                                                                    | 134,950 |
| #5       | MeSH descriptor: [Heart Diseases] explode all trees                                                                                                                                                                                                                                                                                                                                                                                                                                                                                                             | 64,900  |
| #6       | MeSH descriptor: [Hypertension] explode all trees                                                                                                                                                                                                                                                                                                                                                                                                                                                                                                               | 22,327  |
| #7       | MeSH descriptor: [Pulmonary Heart Disease] explode all trees                                                                                                                                                                                                                                                                                                                                                                                                                                                                                                    | 75      |
| #8       | MeSH descriptor: [Myocardial Ischemia] explode all trees                                                                                                                                                                                                                                                                                                                                                                                                                                                                                                        | 34,411  |
| #9       | MeSH descriptor: [Coronary Artery Disease] explode all trees                                                                                                                                                                                                                                                                                                                                                                                                                                                                                                    | 8,182   |
| #10      | MeSH descriptor: [Heart Failure] explode all trees                                                                                                                                                                                                                                                                                                                                                                                                                                                                                                              | 12,328  |
| #11      | MeSH descriptor: [Cerebrovascular Disorders] explode all trees                                                                                                                                                                                                                                                                                                                                                                                                                                                                                                  | 20,844  |
| #12      | MeSH descriptor: [Brain Ischemia] explode all trees                                                                                                                                                                                                                                                                                                                                                                                                                                                                                                             | 4,836   |
| #13      | MeSH descriptor: [Stroke] explode all trees                                                                                                                                                                                                                                                                                                                                                                                                                                                                                                                     | 14,102  |
| #14      | MeSH descriptor: [Arteriosclerosis] explode all trees                                                                                                                                                                                                                                                                                                                                                                                                                                                                                                           | 12,642  |
| #15      | MeSH descriptor: [Peripheral Arterial Disease] explode all trees                                                                                                                                                                                                                                                                                                                                                                                                                                                                                                | 2,238   |
| #16      | (“cardiovascular disease*” OR CVD OR “heart disease*” OR “heart<br>disorder*” OR “cardiac disease*” OR “cardiac disorder*” OR “heart<br>attack” OR “heart*” OR “cardiac” OR “Blood Pressure*” OR<br>“Hypertension” OR “Hypersensitive” OR “Pulmonary Heart Disease*”<br>OR “Cor Pulmonale” OR “myocardial ischemia” OR “ischemic heart<br>disease” OR “coronary artery disease” OR “coronary heart disease” OR<br>CAD OR “coronary disease” OR “myocardial infarction” OR “angina” OR<br>“acute coronary syndrome” OR “coronary” OR “Heart Failure” OR          | 370,189 |

“Cardiac Failure” OR “Heart Decompensation” OR “Myocardial Failure” OR “Congestive Heart Failure” OR “Cerebrovascular Disorder\*” OR “Intracranial Vascular Disease\*” OR “Intracranial Vascular Disorder\*” OR “Cerebrovascular Disease\*” OR “Brain Vascular Disorder\*” OR “Brain Vascular Disease\*” OR “Cerebrovascular Occlusion\*” OR “Cerebrovascular Insufficiency” OR “Brain Ischemia\*” OR “Ischemic Encephalopath\*” OR “Cerebral Ischemia\*” OR “Brain infarction” OR “Cerebral infarction” OR “Brain Stem infarction” OR “Transient ischemic attack” OR TIA OR “Stroke” OR “Cerebrovascular accident” OR CVA OR “Arteriosclerosis” OR “Atherosclerosis” OR “Arterioscleroses” OR ASCVD OR “Peripheral Arterial Disease\*” OR PAD OR “Intermittent Claudication” OR “Fontaine” OR MACE OR “major adverse cardiovascular events” OR “cardiovascular events” OR “cardiac events” OR “cardiac death” OR “cardiac mortality” OR “cardiovascular death” OR “cardiovascular mortality”):ti,ab,kw

#17 #4 OR #5 OR #6 OR #7 OR #8 OR #9 OR #10 OR #11 OR #12 OR #13 OR #14 394,768  
OR #15 OR #16  
#18 #3 AND #17 549

## 2. Changes from protocol

We initially defined cardiovascular disease as the compositions including cerebrovascular disease and peripheral vascular disease, but when we reconsider the definition later we hold that the heterogeneity among these diseases was so significant that we finally decided to limit this definition to the coronary artery disease, any ischemic heart disease, hypertension, and heart failure. They are common cardiovascular disease and the progress have been supposed to be associated with serum uric acid. In addition, we supplemented some subgroup analyses to provide more evidence-based information. Sensitivity analysis was performed to explore underlying causes of heterogeneity.

## 3. Supplementary tables

Table S1: Baseline characteristics of patients enrolled.

| Acronym or author | Age (years) | Females (%) | Body-mass index (kg/m <sup>2</sup> ) | Diabetes (%) | Hypertension (%) | eGFR<60 mL/min/1.73m <sup>2</sup> (%) | Myocardial infarction (%) | Stroke (%) | Dyslipidemia (%) | Heart failure (%) | Serum urate (mg/dL) | Peripheral arterial disease (%) |
|-------------------|-------------|-------------|--------------------------------------|--------------|------------------|---------------------------------------|---------------------------|------------|------------------|-------------------|---------------------|---------------------------------|
| Johnson1991       | 60.1        | 16.0        | -                                    | 25.4         | -                | 26.6                                  | -                         | -          | -                | -                 | -                   | -                               |
| Rashid1991        | 62.2        | 24.4        | -                                    | -            | -                | 0.0                                   | -                         | -          | -                | -                 | -                   | -                               |
| Coghlan1994       | 58.0        | 16.0        | -                                    | 14.0         | -                | -                                     | 34.0                      | -          | -                | -                 | -                   | -                               |
| Taggart1994       | 60.0        | 0.0         | -                                    | -            | -                | -                                     | -                         | -          | -                | -                 | -                   | -                               |
| Castelli1995      | 61.2        | 6.1         | -                                    | -            | -                | -                                     | 78.8                      | -          | -                | 100.0             | -                   | -                               |
| Gimpel1995        | 58.5        | 22.7        | -                                    | -            | -                | -                                     | 50.0                      | -          | -                | -                 | -                   | -                               |

|                    |      |      |      |      |      |       |       |      |      |           |      |      |
|--------------------|------|------|------|------|------|-------|-------|------|------|-----------|------|------|
| Coetzee1996        | 59.4 | 9.6  | -    | -    | -    | -     | -     | -    | -    | -         | -    | -    |
| Tarkka2000         | 60.9 | 0.0  | -    | 22.2 | -    | -     | 51.9  | -    | -    | -         | -    | -    |
| CONFIRMS<br>2010   | 52.8 | 5.6  | 32.8 | 13.8 | -    | 17.7  | -     | -    | 41.5 | -         | 9.6  | -    |
| Rentoukas20<br>10  | 64.2 | 27.5 | -    | 22.5 | 25.0 | -     | 100.0 | -    | -    | -         | 6.9  | -    |
| EXACT-HF2<br>015   | 63.0 | 17.8 | 32.3 | 54.5 | 78.3 | -     | -     | -    | -    | 100.<br>0 | 11.0 | -    |
| Goicoechea2<br>015 | 71.8 | -    | -    | 37.2 | -    | 100.0 | -     | -    | -    | -         | 7.6  | 5.3  |
| Nakagomi20<br>15   | 70.5 | 34.4 | 23.4 | 34.4 | 93.4 | -     | -     | -    | 96.7 | 100.<br>0 | -    | -    |
| Separham201<br>6   | 60.7 | 22.1 | -    | 25.7 | 42.1 | -     | 100.0 | -    | 15.0 | -         | 5.2  | -    |
| Xiao2016           | 51.9 | 26.4 | -    | -    | -    | -     | -     | -    | -    | -         | -    | -    |
| Huang2017          | -    | -    | -    | -    | -    | -     | -     | -    | -    | -         | 8.9  | -    |
| CARES2018          | 64.5 | 16.1 | 33.5 | -    | 92.3 | 52.8  | 39.2  | 14.1 | 86.9 | 20.2      | 8.7  | 12.7 |
| FAST2020           | 70.9 | 14.7 | 31.1 | 22.5 | 78.1 | -     | 10.7  | 5.0  | -    | 4.7       | 5.0  | 4.8  |
| Suzuki2021         | 71.0 | 33.5 | -    | 29.3 | 72.6 | -     | -     | -    | 57.8 | 100.<br>0 | 8.6  | -    |
| ALL-HEAR<br>T2022  | 72.0 | 24.4 | 28.8 | 21.7 | 57.5 | 9.4   | 47.3  | 4.0  | 63.3 | 5.2       | 5.7  | 7.5  |
| O'Dell2022         | 62.1 | 1.6  | 33.7 | 33.3 | 76.4 | 37.3  | -     | -    | -    | -         | 8.5  | -    |

Table S2: The risk of bias table for individual study.

| Study           | D1            | D2            | D3            | D4  | D5            | Overall       |
|-----------------|---------------|---------------|---------------|-----|---------------|---------------|
| Johnson1991     | Low           | Low           | Low           | Low | Some concerns | Some concerns |
| Rashid1991      | Low           | Low           | Low           | Low | Some concerns | Some concerns |
| Coghlan1994     | Low           | Low           | Low           | Low | Some concerns | Some concerns |
| Taggart1994     | Low           | Low           | Low           | Low | Some concerns | Some concerns |
| Castelli1995    | Some concerns | Low           | Low           | Low | Some concerns | Some concerns |
| Gimpel1995      | Some concerns | Low           | Low           | Low | Some concerns | Some concerns |
| Coetzee1996     | Low           | Low           | Low           | Low | Some concerns | Some concerns |
| Tarkka2000      | Some concerns | Low           | Low           | Low | Some concerns | Some concerns |
| CONFIRMS2010    | Low           | Low           | Some concerns | Low | Some concerns | Some concerns |
| Rentoukas2010   | Some concerns | Low           | Low           | Low | Some concerns | Some concerns |
| Taheraghdam2014 | Low           | Low           | Low           | Low | Some concerns | Some concerns |
| EXACT-HF2015    | Low           | Low           | Low           | Low | Low           | Low           |
| Goicoechea2015  | Low           | High          | Some concerns | Low | Low           | High          |
| Nakagomi2015    | Low           | Low           | Low           | Low | Some concerns | Some concerns |
| Separham2016    | Low           | Low           | Low           | Low | Some concerns | Some concerns |
| Xiao2016        | Some concerns | Some concerns | Low           | Low | Some concerns | Some concerns |
| Huang2017       | Some concerns | Some concerns | High          | Low | Some concerns | High          |
| CARES2018       | Low           | Low           | Some concerns | Low | Low           | Some concerns |

|               |     |               |               |     |     |               |
|---------------|-----|---------------|---------------|-----|-----|---------------|
| FAST2020      | Low | Some concerns | Low           | Low | Low | Some concerns |
| Suzuki2021    | Low | Some concerns | High          | Low | Low | High          |
| ALL-HEART2022 | Low | Some concerns | Low           | Low | Low | Some concerns |
| O'Dell2022    | Low | Low           | Some concerns | Low | Low | Some concerns |

D1 Randomization process

D2 Deviations from the intended interventions

D3 Missing outcome data

D4 Measurement of the outcome

D5 Selection of the reported result

## 4. Supplementary figures

### 4.1 sensitivity analyses

#### 3.1.1 Comparison 1. Allopurinol vs placebo/usual care

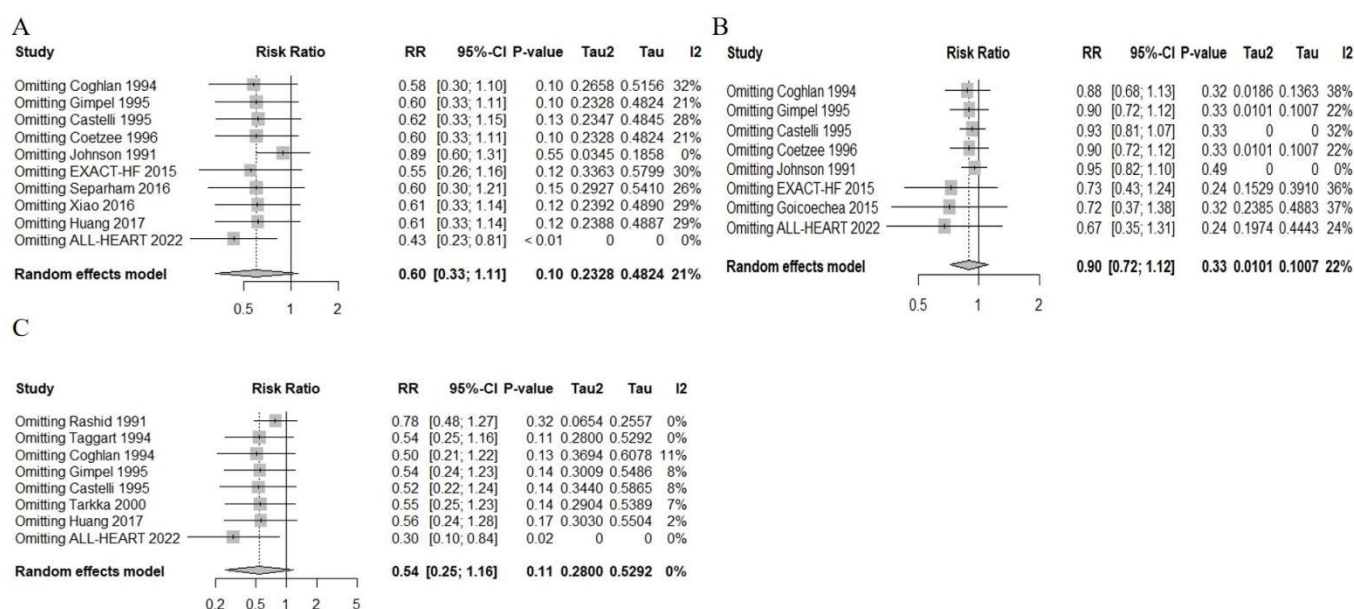

Figure S1. Sensitivity analysis for the pooled analysis comparing allopurinol with placebo/usual care.

A) Cardiovascular death; B) All-cause death; C) MI

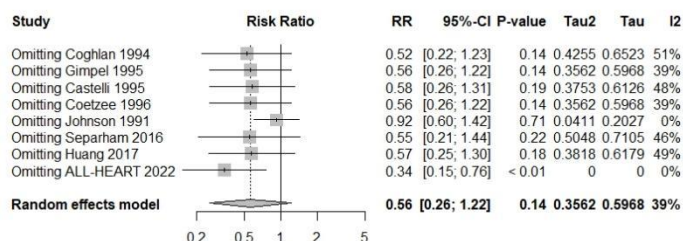

Figure S2. Sensitivity analysis for the pooled analysis for CV death comparing allopurinol with placebo/usual care among the sub-cohort with coronary artery disease or ischemic heart disease.

### 3.1.2 Comparison 2. Allopurinol vs febuxostat

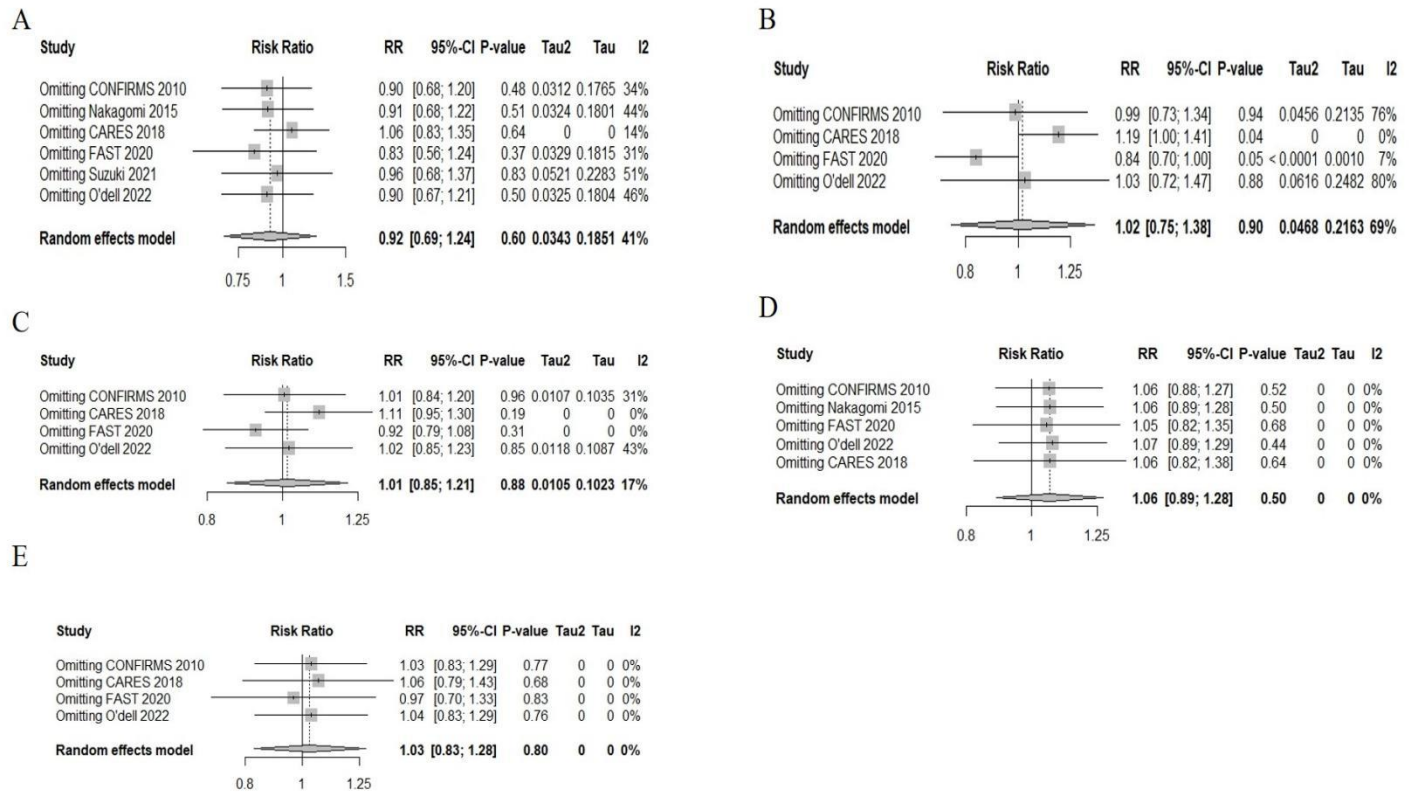

Figure S3. Sensitivity analysis for the pooled analysis comparing allopurinol with febuxostat.

A) Cardiovascular death; B) All-cause death; C) MACEs; D) MI; E) stroke
